# Supplementary material for: Chelating agents as coating molecules for iron oxide nanoparticles
Source: Royal Society of Chemistry journal article supplement (doi:10.1039/c7ra08217g), 2017-01-01
Supplement: c7ra08217g2.pdf [file c7ra08217g2.pdf]

## Supplementary data

### Chelating agents as coating molecules for iron oxide nanoparticles

Debora Bonvin,<sup>1</sup> Jessica A.M. Bastiaansen,<sup>2,3</sup> Matthias Stuber,<sup>2,3</sup> Heinrich Hofmann,<sup>1</sup> and Marijana Mionić Ebersold<sup>1,2,3\*</sup>

<sup>1</sup>Powder Technology Laboratory, Insitute of Materials, Ecole polytechnique fédérale de Lausanne, Switzerland.

<sup>2</sup>Department of Radiology, University Hospital (CHUV) and University of Lausanne (UNIL), Switzerland.

<sup>3</sup>Center of Biomedical Imaging (CIBM), Lausanne, Switzerland.

\*Corresponding author E-mail addresses: marijanamionic@gmail.com; Marijana.Mionic-Ebersold@chuv.ch.

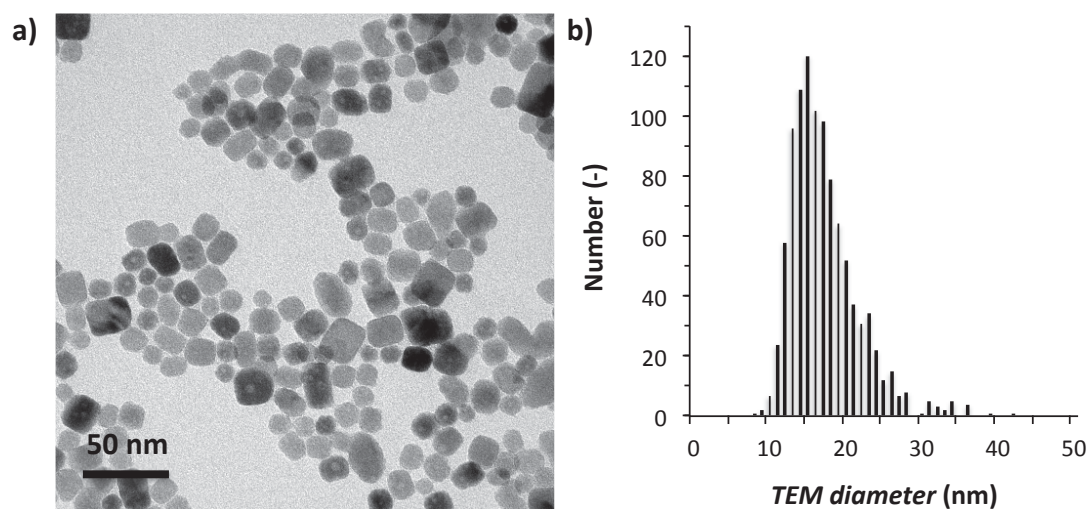

**Fig. S1:** (a) Representative TEM micrograph and (b) distribution of the *TEM diameter* of uncoated IONPs.

**Table S1:** pKa values of IDA, NTA, EDTA and DTPA measured at 25 °C.<sup>1</sup>

|      | pKa                              |
|------|----------------------------------|
| IDA  | 2.82 / 9.87                      |
| NTA  | 2.14 / 2.71 / 9.56               |
| EDTA | 2.25 / 2.64 / 7.18 / 9.26        |
| DTPA | 2.32 / 2.94 / 4.41 / 8.62 / 9.98 |

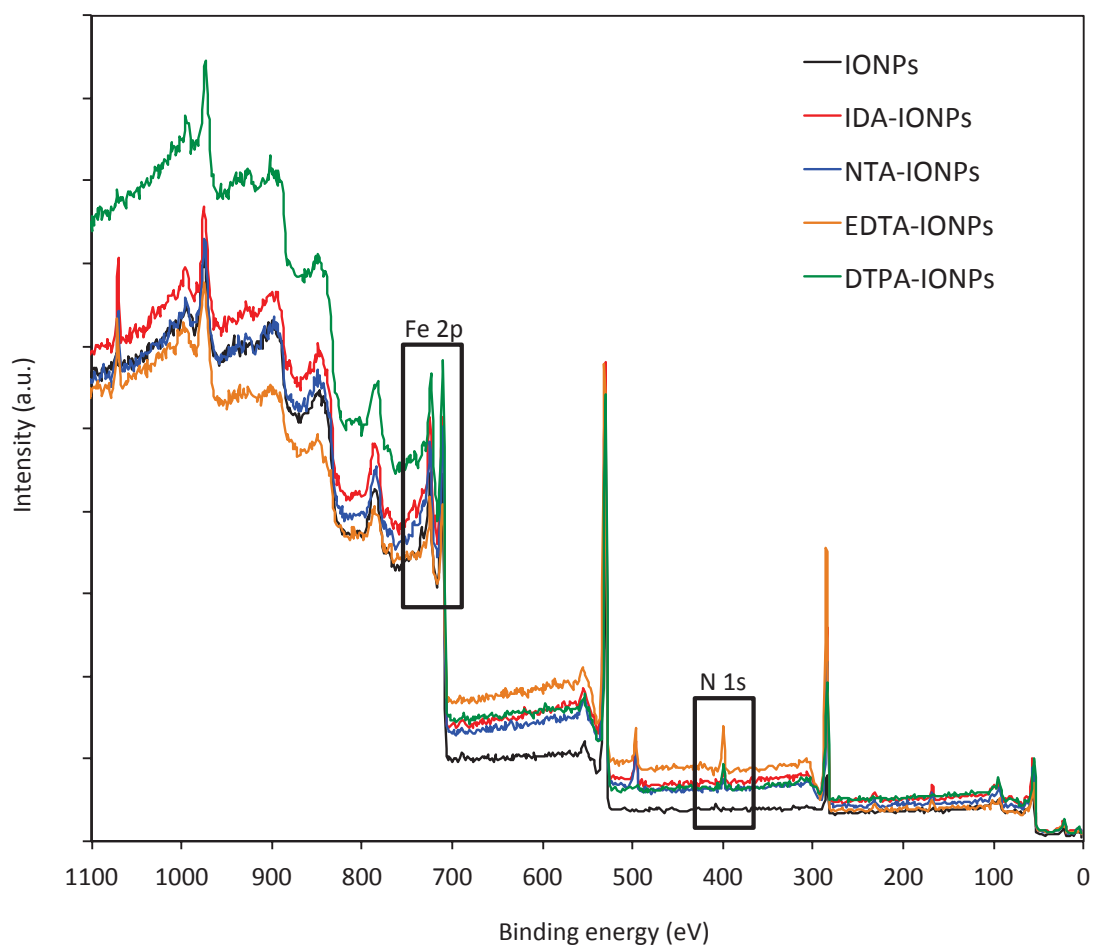

**Fig. S2:** Overall XPS spectra of uncoated IONPs, IDA-IONPs, NTA-IONPs, EDTA-IONPs and DTPA-IONPs. The N 1s and Fe 2p peaks are highlighted with a black box.

**Table S2:** Atomic percentages of Fe, O, C and N obtained by XPS in uncoated IONPs, IDA-IONPs, NTA-IONPs, EDTA-IONPs and DTPA-IONPs.

| Atomic %   | Fe 2p | O 1s | C 1s | N 1s |
|------------|-------|------|------|------|
| IONPs      | 32.0  | 50.6 | 17.3 | -    |
| IDA-IONPs  | 18.5  | 42.6 | 37.9 | 1.1  |
| NTA-IONPs  | 22.0  | 44.4 | 31.9 | 1.7  |
| EDTA-IONPs | 8.3   | 31.1 | 56.8 | 3.9  |
| DTPA-IONPs | 23.2  | 43.1 | 30.7 | 3.1  |

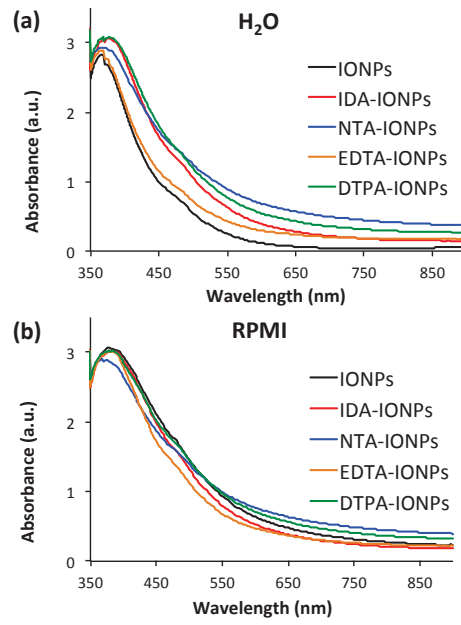

**Fig. S3:** Absorbance measured by UV-visible spectroscopy in H<sub>2</sub>O (a) and in RPMI medium (b) of uncoated IONPs, IDA-IONPs, NTA-IONPs, EDTA-IONPs and DTPA-IONPs.

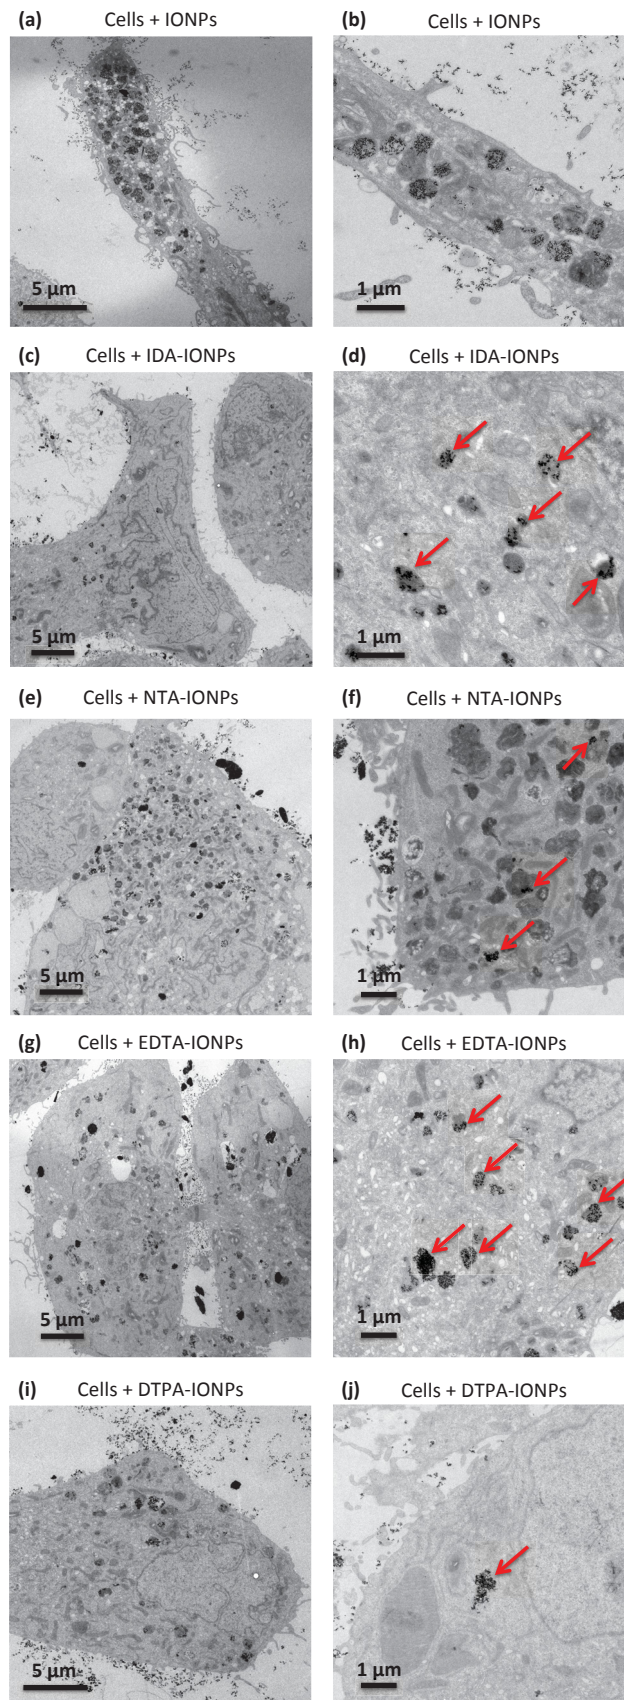

**Fig. S4:** Representative TEM micrographs of 50 nm-thick sections of LnCaP cells incubated with uncoated IONPs (a, b), IDA-IONPs (c, d), NTA-IONPs (e, f), EDTA-IONPs (g, h) and DTPA-IONPs (i, j) and embedded in resin.

## References

- 1 P. Thakur, J. N. Mathur, R. C. Moore and G. R. Choppin, *Inorganica Chim. Acta*, 2007, **360**, 3671–3680.
